# Supplementary material for: Differential CXCR4 expression on hematopoietic progenitor cells versus stem cells directs homing and engraftment
Source: JCI journal article supplement (doi:10.1172/jci.insight.151847), 2022-05-08
Supplement: sd1 [file 1]

You are being redirected.
